# Supplementary material for: Occupational inequalities in the prevalence of COVID-19: A longitudinal observational study of England, August 2020 to January 2021
Source: PubMed Central journal article supplement (PMC10075431; doi:10.1371/journal.pone.0283119), 2023-04-05
Supplement: pone.0283119.s001.pdf [file pone.0283119.s001.pdf]

## Appendix

**Table A: Descriptions of work sector categories.**

| <b>Work Sector</b> | <b>Example occupations</b>                                 |
|--------------------|------------------------------------------------------------|
| ICT                | IT technician, software engineer, programmer, web designer |
| Education          | Teacher, lecturer, school workers                          |
| Health care        | Doctor, nurse, dentists, health professionals, pharmacists |
| Social care        | Carer, social workers, welfare professionals               |
| Transport          | Bus driver, logistics, storage firms, taxi driver          |
| Retail sector      | Shop assistant, retail cashier, check-out operators        |
| Hospitality        | Server, waiting staff, bar staff, chef                     |
| Food production    | Farmer, agricultural labourer, butcher, baker              |
| Personal services  | Hairdresser, barber, cleaner, beautician                   |
| Finance            | Insurance, banking, accountant,                            |
| Manufacturing      | Construction, skilled and non-skilled trades, engineers    |
| Civil service      | Local Government worker, health and safety officer,        |
| Armed forces       | Soldier, naval officer, air forces pilot                   |
| Entertainment      | Actor, artist, musician, recreational officer              |

**Table B: Sample summary statistics.**

| <b>Variable</b>            | <b>Mean (SD)</b>      |
|----------------------------|-----------------------|
| Age                        | 53.96 (17.1)          |
| <b>Variable</b>            | <b>Percentage (%)</b> |
| <i>Test outcome</i>        |                       |
| Negative                   | 96.9                  |
| Positive                   | 0.9                   |
| Void                       | 2.2                   |
| <i>Sex</i>                 |                       |
| Male                       | 46.6                  |
| Female                     | 53.4                  |
| <i>Ethnicity</i>           |                       |
| White British              | 87.9                  |
| Any other ethnic group     | 2.0                   |
| Any other white background | 4.1                   |
| Chinese                    | 0.5                   |
| Indian                     | 1.9                   |
| Pakistani                  | 0.4                   |
| Black-African              | 0.4                   |
| Black Afro-Caribbean       | 0.3                   |
| Mixed-White & Asian        | 0.4                   |
| Mixed-White & Black        | 0.4                   |
| White-Irish                | 1.7                   |

|                    |      |
|--------------------|------|
| <i>Work status</i> |      |
| Employed           | 47.1 |
| Self-employed      | 4.3  |
| Furloughed         | 3.9  |
| Not working        | 42.6 |
| Student            | 2.1  |
| <hr/>              |      |
| <i>Work sector</i> |      |
| ICT                | 7.6  |
| Education          | 14.4 |
| Health care        | 11.4 |
| Social care        | 3.0  |
| Transport          | 4.1  |
| Retail sector      | 7.5  |
| Hospitality        | 3.3  |
| Food production    | 1.7  |
| Personal services  | 1.4  |
| Finance            | 8.7  |
| Manufacturing      | 10.0 |
| Civil service      | 7.1  |
| Armed forces       | 0.4  |
| Entertainment      | 2.9  |
| Other              | 16.5 |
| <hr/>              |      |
| <i>Month</i>       |      |
| August             | 6.0  |
| September          | 12.9 |
| October            | 23.1 |
| November           | 20.5 |
| December           | 18.3 |
| January            | 19.2 |

**Table C: Percentage of records with missing data.**

| Variable       | Missing (%) |
|----------------|-------------|
| Test outcome   | 3.57        |
| Age            | 0.00        |
| Sex            | 0.00        |
| Ethnicity      | 0.02        |
| Work status    | 0.06        |
| Work sector    | 3.57        |
| Month          | 0.00        |
| Geography      | 10.98       |
| Travel abroad  | 3.20        |
| Household size | 0.00        |

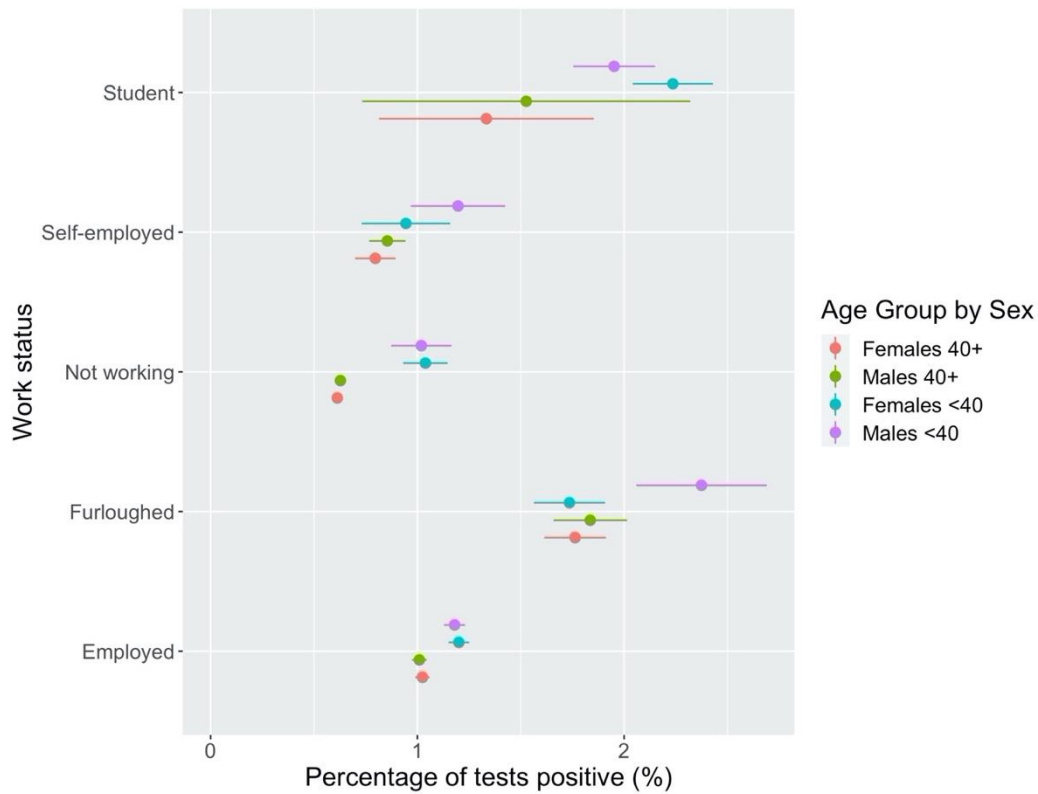

**Figure A: COVID-19 Prevalence by work status and sex for individuals by age group.**

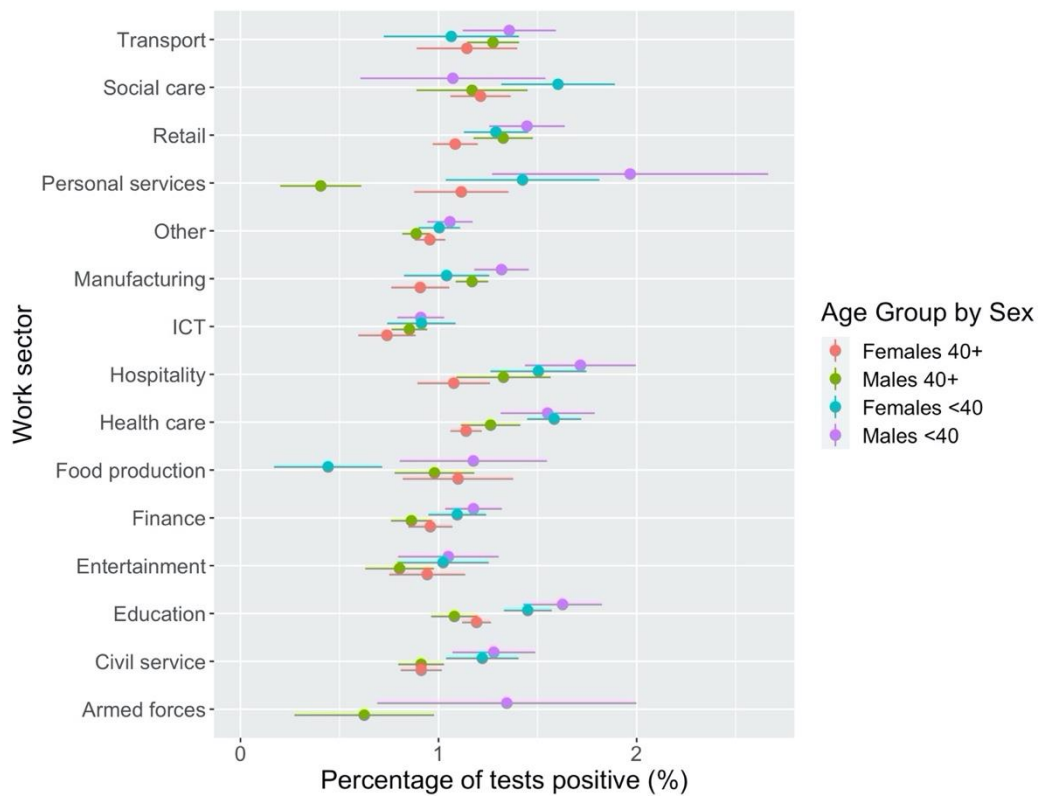

**Figure B: COVID-19 prevalence by work sector and sex for individuals by age group. Note: estimate for females employed in the armed forces excluded due to counts <10 to preserve ONS data disclosure standards.**

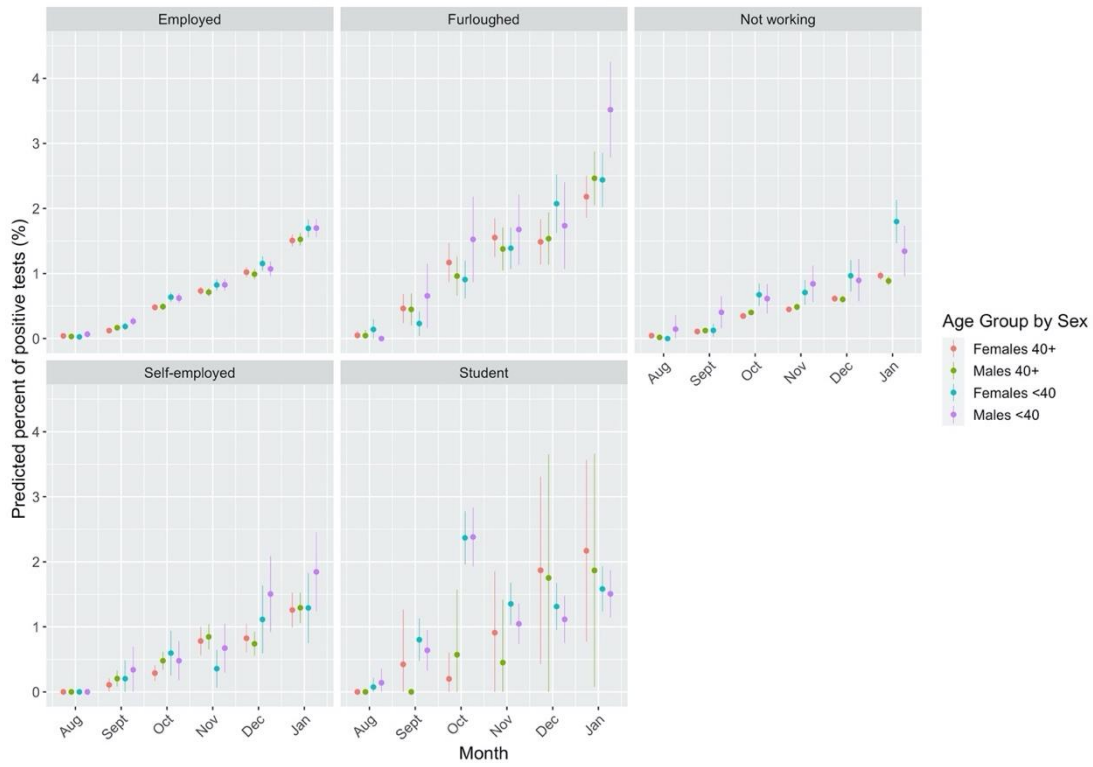

**Figure C: Predicted probability of testing positive for COVID-19 by work status, sex and month stratified by age group.**

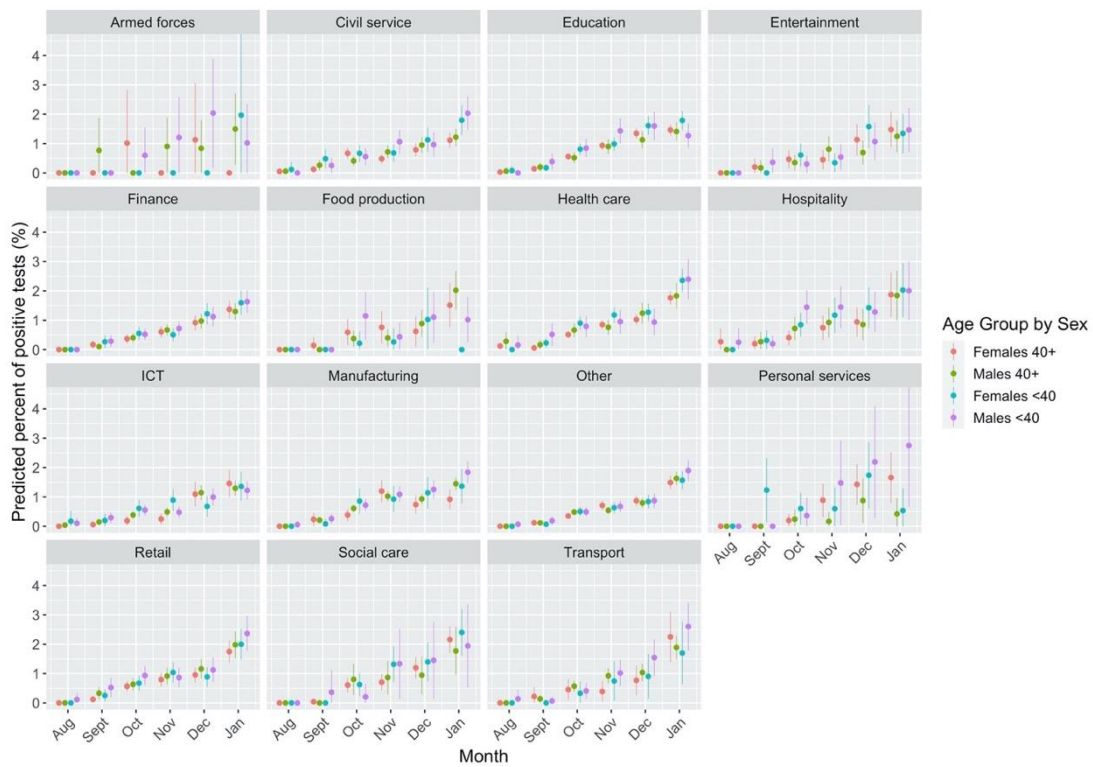

**Figure D: Predicted probability of testing positive for COVID-19 by work sector, sex and month stratified by age group.**
